# Supplementary material for: Effect of Parents’ Time With Children on the Relationship Between the Children’s Use of Electronic Devices and Their Sociability
Source: Research Square preprint supplement (doi:10.21203/rs.3.rs-134062/v1), 2021-01-04
Supplement: Supplementary file 1 [file 0c7858849333fdc2f7664f67.pdf]

**Table 1** Sample characteristics ( $n=2164$ )

| Characteristics                          | <i>n</i> | %    | <i>M</i>     | <i>SD</i>   |
|------------------------------------------|----------|------|--------------|-------------|
| <b>Father's education</b>                |          |      | <b>14.40</b> | <b>2.61</b> |
| Elementary school and below              | 15       | 0.7  |              |             |
| Junior high school                       | 118      | 5.5  |              |             |
| Senior high school (professional school) | 622      | 28.7 |              |             |
| Junior college                           | 314      | 14.5 |              |             |
| University or two-year college           | 701      | 32.4 |              |             |
| Master and above                         | 352      | 16.3 |              |             |
| <b>Mother's education</b>                |          |      | <b>14.38</b> | <b>2.48</b> |
| Elementary school and below              | 20       | 0.9  |              |             |
| Junior high school                       | 112      | 5.2  |              |             |
| Senior high school (professional school) | 560      | 25.9 |              |             |
| Junior college                           | 347      | 16.0 |              |             |
| University or two-year college           | 865      | 40.0 |              |             |
| Master and above                         | 229      | 10.6 |              |             |
| <b>Father's NES</b>                      |          |      |              |             |
| Never                                    | 966      | 47.1 |              |             |
| Rarely                                   | 694      | 33.8 |              |             |
| Sometimes                                | 343      | 16.7 |              |             |
| Often                                    | 48       | 2.3  |              |             |

**Table 1** Sample characteristics ( $n=2164$ ) (*Continued*)

| Characteristics                 | <i>n</i> | %    | <i>M</i> | <i>SD</i> |
|---------------------------------|----------|------|----------|-----------|
| <b>Mother's NES</b>             |          |      |          |           |
| Never                           | 872      | 41.5 |          |           |
| Rarely                          | 690      | 32.8 |          |           |
| Sometimes                       | 456      | 21.7 |          |           |
| Often                           | 84       | 4.0  |          |           |
| <b>Children's health status</b> |          |      |          |           |
| Severe health problem           | 3        | 0.1  |          |           |
| Often sick                      | 44       | 2.0  |          |           |
| Normal and occasionally sick    | 758      | 35.1 |          |           |
| Very healthy                    | 1,355    | 62.7 |          |           |
| <b>Using stationary devices</b> |          |      |          |           |
| None                            | 118      | 5.5  |          |           |
| Less than 0.5 hour              | 346      | 16.0 |          |           |
| 0.5–1 hour                      | 460      | 21.3 |          |           |
| 1–1.5 hours                     | 313      | 14.5 |          |           |
| 1.5–2 hours                     | 299      | 13.8 |          |           |
| 2–2.5 hours                     | 142      | 6.6  |          |           |
| 2.5–3 hours                     | 164      | 7.6  |          |           |
| 3–3.5 hours                     | 74       | 3.4  |          |           |
| 3.5–4 hours                     | 77       | 3.6  |          |           |

**Table 1** Sample characteristics (*n*=2164) (*Continued*)

| Characteristics                       | <i>n</i> | %    | <i>M</i> | <i>SD</i> |
|---------------------------------------|----------|------|----------|-----------|
| 4–4.5 hours                           | 49       | 2.3  |          |           |
| 4.5–5 hours                           | 29       | 1.3  |          |           |
| More than 5 hours                     | 88       | 4.1  |          |           |
| <b>Using mobile devices</b>           |          |      |          |           |
| None                                  | 527      | 24.4 |          |           |
| Less than 0.5 hour                    | 751      | 34.8 |          |           |
| 0.5–1 hour                            | 409      | 18.9 |          |           |
| 1–1.5 hours                           | 159      | 7.4  |          |           |
| 1.5–2 hours                           | 138      | 6.4  |          |           |
| 2–2.5 hours                           | 50       | 2.3  |          |           |
| 2.5–3 hours                           | 52       | 2.4  |          |           |
| 3–3.5 hours                           | 14       | 0.6  |          |           |
| 3.5–4 hours                           | 14       | 0.6  |          |           |
| 4–4.5 hours                           | 13       | 0.6  |          |           |
| 4.5–5 hours                           | 6        | 0.3  |          |           |
| More than 5 hours                     | 27       | 1.3  |          |           |
| <b>Time with children on weekdays</b> |          |      |          |           |
| None                                  | 75       | 3.5  |          |           |
| Less than 1hour                       | 43       | 2.0  |          |           |
| 1–2 hours                             | 181      | 8.4  |          |           |

**Table 1** Sample characteristics ( $n=2164$ ) (*Continued*)

| Characteristics                                    | <i>n</i> | %    | <i>M</i> | <i>SD</i> |
|----------------------------------------------------|----------|------|----------|-----------|
| 2–3 hours                                          | 282      | 13.1 |          |           |
| 3–4 hours                                          | 295      | 13.7 |          |           |
| 4–5 hours                                          | 271      | 12.6 |          |           |
| 5–6 hours                                          | 190      | 8.8  |          |           |
| 6–7 hours                                          | 78       | 3.6  |          |           |
| 7–8 hours                                          | 84       | 3.9  |          |           |
| 8–9 hours                                          | 56       | 2.6  |          |           |
| 9–10 hours                                         | 50       | 2.3  |          |           |
| More than 10 hours                                 | 553      | 25.6 |          |           |
| <b>Time with children on weekends and holidays</b> |          |      |          |           |
| None                                               | 3        | 0.1  |          |           |
| Less than 1 hour                                   | 9        | 0.4  |          |           |
| 1–2 hours                                          | 25       | 1.2  |          |           |
| 2–3 hours                                          | 33       | 1.5  |          |           |
| 3–4 hours                                          | 44       | 2.0  |          |           |
| 4–5 hours                                          | 71       | 3.3  |          |           |
| 5–6 hours                                          | 94       | 4.4  |          |           |
| 6–7 hours                                          | 52       | 2.4  |          |           |
| 7–8 hours                                          | 129      | 6.0  |          |           |

**Table 1** Sample characteristics ( $n=2164$ ) (*Continued*)

| Characteristics    | <i>n</i> | %    | <i>M</i> | <i>SD</i> |
|--------------------|----------|------|----------|-----------|
| 8–9 hours          | 98       | 4.5  |          |           |
| 9–10 hours         | 106      | 4.9  |          |           |
| More than 10 hours | 1,491    | 69.2 |          |           |

**Table 2** Regression analysis for children's sociability (moderating effect)

|                                             | <i>t</i> | $\beta$  | VIF   |
|---------------------------------------------|----------|----------|-------|
| <b>Control variables</b>                    |          |          |       |
| Father's education                          | -0.003   | .000     | 1.667 |
| Mother's education                          | 1.411    | .041     | 1.705 |
| Father's NES                                | -0.839   | -.027    | 2.187 |
| Mother's NES                                | -1.012   | -.033    | 2.201 |
| Children's health status                    | 4.264    | .096**   | 1.046 |
| <b>Independent variables</b>                |          |          |       |
| Using stationary devices                    | -3.183   | -.074*** | 1.097 |
| Using mobile devices                        | -2.286   | -.054*   | 1.137 |
| <b>Moderator variables</b>                  |          |          |       |
| Time with children on weekdays              | 1.750    | .042     | 1.149 |
| Time with children on weekends and holidays | 2.496    | .060*    | 1.175 |

**Table 2** Regression analysis for children's sociability (moderating effect) (*Continued*)

|                                                                               | <i>t</i> | $\beta$     | VIF   |
|-------------------------------------------------------------------------------|----------|-------------|-------|
| Using stationary devices $\times$ Time with children on weekdays              | 2.018    | .048*       | 1.174 |
| Using stationary devices $\times$ Time with children on weekends and holidays | -0.491   | -.012       | 1.266 |
| Using mobile devices $\times$ Time with children on weekdays                  | 0.699    | .017        | 1.198 |
| Using mobile devices $\times$ Time with children on weekends and holidays     | -0.169   | -.004       | 1.308 |
| <i>F</i>                                                                      |          | 6.483**     |       |
| <i>df</i>                                                                     |          | 1,959       |       |
| $R^2$ (adjusted $R^2$ )                                                       |          | .041 (.035) |       |

\* $p < .05$ . \*\* $p < .001$ .

**Table 3** Hierarchical regression analysis for children's sociability (mediating effect)

|                              | Step1    |          |       | Step2    |          |       |
|------------------------------|----------|----------|-------|----------|----------|-------|
|                              | <i>t</i> | $\beta$  | VIF   | <i>t</i> | $\beta$  | VIF   |
| <b>Control variables</b>     |          |          |       |          |          |       |
| Father's education           | 0.041    | .001     | 1.657 | -0.086   | -.002    | 1.661 |
| Mother's education           | 1.300    | .037     | 1.681 | 1.353    | .039     | 1.698 |
| Father's NES                 | -0.735   | -.024    | 2.185 | -0.793   | -.026    | 2.185 |
| Mother's NES                 | -1.173   | -.039    | 2.193 | -1.080   | -.035    | 2.199 |
| Children's health status     | 4.519    | .102***  | 1.028 | 4.183    | .094***  | 1.039 |
| <b>Independent variables</b> |          |          |       |          |          |       |
| Using stationary devices     | -3.436   | -.079*** | 1.085 | -3.246   | -.075*** | 1.089 |
| Using mobile devices         | -2.598   | -.061**  | 1.101 | -2.392   | -.056*   | 1.107 |

**Table 3** Hierarchical regression analysis for children's sociability (mediating effect) (*Continued*)

|                                                | Step1               |         |     | Step2               |         |       |
|------------------------------------------------|---------------------|---------|-----|---------------------|---------|-------|
|                                                | <i>t</i>            | $\beta$ | VIF | <i>t</i>            | $\beta$ | VIF   |
| <b>Mediator variables</b>                      |                     |         |     |                     |         |       |
| Time with children on weekdays                 |                     |         |     | 1.717               | .041    | 1.147 |
| Time with children on weekends<br>and holidays |                     |         |     | 2.579               | .061**  | 1.154 |
| <i>F</i> ( $\Delta F$ )                        | 9.221*** (9.221***) |         |     | 8.774*** (7.010***) |         |       |
| <i>df</i>                                      | 1,965               |         |     | 1,963               |         |       |
| $R^2$ (adjusted $R^2$ )                        | .032 (.028)         |         |     | .039(.034)          |         |       |
| $\Delta R^2$                                   | .032                |         |     | .007                |         |       |

\* $p < .05$ . \*\* $p < .01$ . \*\*\* $p < .001$ .

**Table 4** Regression analysis for time with children on weekends and holidays  
(mediating effect)

|                               | <i>t</i> | $\beta$     | VIF   |
|-------------------------------|----------|-------------|-------|
| <b>Control variables</b>      |          |             |       |
| Father's education            | 2.129    | .061*       | 1.660 |
| Mother's education            | 1.437    | .041        | 1.685 |
| Father's NES                  | 0.375    | .012        | 2.189 |
| Mother's NES                  | -1.929   | -.063       | 2.197 |
| Children's health status      | 2.339    | .053*       | 1.028 |
| <b>Independent variables</b>  |          |             |       |
| Using stationary devices      | -1.621   | -.038       | 1.087 |
| Using mobile devices          | -3.237   | -.075***    | 1.103 |
| <i>F</i>                      |          | 8.368***    |       |
| <i>df</i>                     |          | 1,971       |       |
| $R^2$ (adjusted $R^2$ )       |          | .029 (.025) |       |
| * $p < .05$ . ** $p < .001$ . |          |             |       |
